# Supplementary material for: Recapture and retreatment rates with ixekizumab after withdrawal of therapy in patients with axial spondyloarthritis: results at week 104 from a randomised placebo-controlled withdrawal study
Source: PubMed Central journal article supplement — Ann Rheum Dis. 2022 Sep 13;82(2):212–6. doi: 10.1136/ard-2022-222731 (PMC9887347; doi:10.1136/ard-2022-222731), 2022-09-13

**Supplementary Figure 2.** The proportion (%) of patients who remained flare-free based on an ASDAS worsening of  $\geq 0.9$  through 104 weeks. \* $p < 0.05$ , † $p < 0.01$ , ‡ $p < 0.001$  versus IXE Withdrawal (placebo).

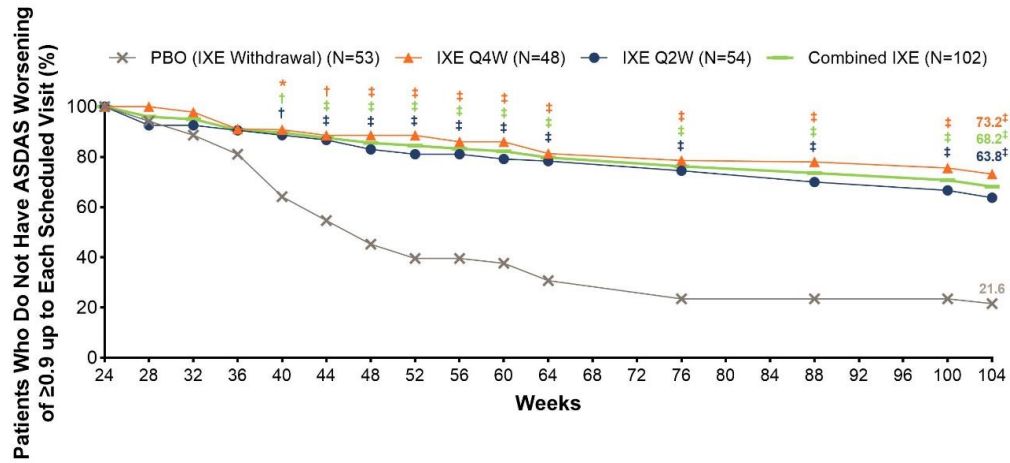

Supplement: ard-2022-222731supp002.pdf [file ard-2022-222731supp002.pdf]
