# Supplementary material for: Recapture and retreatment rates with ixekizumab after withdrawal of therapy in patients with axial spondyloarthritis: results at week 104 from a randomised placebo-controlled withdrawal study
Source: PubMed Central journal article supplement — Ann Rheum Dis. 2022 Sep 13;82(2):212–6. doi: 10.1136/ard-2022-222731 (PMC9887347; doi:10.1136/ard-2022-222731), 2022-09-13
Supplement: ard-2022-222731supp003.pdf [file ard-2022-222731supp003.pdf]

**Supplementary Table 1.** Baseline demographics and disease characteristics at week 0 of COAST-Y and disease characteristics at week 24 of COAST-Y.

|                                                      | Randomised withdrawal-retreatment period (N=155) |                 |                 |                       |
|------------------------------------------------------|--------------------------------------------------|-----------------|-----------------|-----------------------|
|                                                      | Withdrawn to placebo<br>N=53                     | IXE Q4W<br>N=48 | IXE Q2W<br>N=54 | Combined IXE<br>N=102 |
| <b>Baseline demographics at week 0 of COAST-Y</b>    |                                                  |                 |                 |                       |
| Age                                                  | 38.5 (12.7)                                      | 36.5 (9.7)      | 38.4 (10.8)     | 37.5 (11.3)           |
| Sex                                                  |                                                  |                 |                 |                       |
| Male, n (%)                                          | 38 (71.7)                                        | 38 (79.2)       | 40 (74.1)       | 78 (76.5)             |
| BMI (kg/m <sup>2</sup> )                             | 25.5 (3.9)                                       | 25.9 (4.5)      | 25.9 (4.7)      | 25.9 (4.6)            |
| axSpA symptom duration (years)                       | 12.6 (9.6)                                       | 12.6 (7.5)      | 12.9 (8.6)      | 12.7 (8.0)            |
| axSpA diagnosis duration (years)                     | 6.6 (7.5)                                        | 7.1 (7.0)       | 7.6 (8.4)       | 7.4 (7.7)             |
| HLA-B27 positive, n (%) <sup>a</sup>                 | 45 (84.9)                                        | 43 (89.6)       | 49 (90.7)       | 92 (90.2)             |
| DMARDs use, n (%)                                    | 21 (39.6)                                        | 18 (37.5)       | 24 (44.4)       | 42 (41.2)             |
| NSAID use, n (%)                                     | 50 (94.3)                                        | 44 (91.7)       | 51 (94.4)       | 95 (93.1)             |
| Prior TNFi use, n (%) <sup>*</sup>                   |                                                  |                 |                 |                       |
| 0                                                    | 44 (83.0)                                        | 39 (81.3)       | 46 (85.2)       | 85 (83.3)             |
| 1                                                    | 9 (17.0)                                         | 3 (6.3)         | 8 (14.8)        | 11 (10.8)             |
| 2                                                    | 0                                                | 6 (12.5)        | 0               | 6 (5.9)               |
| <b>Disease characteristics at week 0 of COAST-Y</b>  |                                                  |                 |                 |                       |
| C-reactive protein (mg/L) <sup>a</sup>               |                                                  |                 |                 |                       |
| ≤5 mg/L, n (%)                                       | 24 (45.3)                                        | 19 (39.6)       | 18 (33.3)       | 37 (36.3)             |
| >5 mg/L, n (%)                                       | 29 (54.7)                                        | 29 (60.4)       | 36 (66.7)       | 65 (63.7)             |
| ASDAS                                                | 1.3 (0.5)                                        | 1.3 (0.6)       | 1.3 (0.5)       | 1.3 (0.5)             |
| ASDAS LDA (<2.1), n (%)                              | 48 (90.6)                                        | 43 (91.5)       | 50 (96.2)       | 93 (93.9)             |
| ASDAS ID (<1.3), n (%)                               | 36 (67.9)                                        | 29 (61.7)       | 30 (57.7)       | 59 (59.6)             |
| BASDAI score                                         | 1.3 (1.1)                                        | 1.4 (1.1)       | 1.6 (1.2)       | 1.5 (1.1)             |
| BASDAI spinal pain <sup>‡</sup>                      | 1.5 (1.2)                                        | 1.7 (1.5)       | 1.7 (1.3)       | 1.7 (1.4)             |
| BASDAI morning stiffness <sup>§</sup>                | 1.1 (1.1)                                        | 1.1 (1.1)       | 1.3 (1.3)       | 1.2 (1.2)             |
| <b>Disease characteristics at week 24 of COAST-Y</b> |                                                  |                 |                 |                       |
| C-reactive protein (mg/L)                            |                                                  |                 |                 |                       |
| ≤5 mg/L, n (%)                                       | 46 (86.8)                                        | 38 (79.2)       | 49 (90.7)       | 87 (85.3)             |
| >5 mg/L, n (%)                                       | 7 (13.2)                                         | 10 (20.8)       | 5 (9.3)         | 15 (14.7)             |
| ASDAS                                                | 1.2 (0.5)                                        | 1.3 (0.5)       | 1.2 (0.4)       | 1.2 (0.5)             |
| BASDAI score                                         | 1.2 (1.1)                                        | 1.2 (1.0)       | 1.3 (1.1)       | 1.2 (1.0)             |
| BASDAI spinal pain <sup>‡</sup>                      | 1.5 (1.7)                                        | 1.4 (1.5)       | 1.4 (1.2)       | 1.4 (1.4)             |
| BASDAI morning stiffness <sup>§</sup>                | 1.1 (1.3)                                        | 0.8 (1.0)       | 0.9 (0.9)       | 0.8 (0.9)             |
| PatGA                                                | 1.3 (1.4)                                        | 1.5 (1.4)       | 1.3 (1.2)       | 1.4 (1.3)             |
| BASFI score                                          | 1.1 (1.1)                                        | 1.2 (1.2)       | 1.0 (1.1)       | 1.1 (1.2)             |
| BASMI score                                          | 2.5 (1.3)                                        | 2.7 (1.3)       | 2.8 (1.4)       | 2.8 (1.3)             |

Data are presented as mean (SD), unless otherwise specified. <sup>a</sup>HLA-B27 status and C-reactive protein status were assessed at the start of the originating study. <sup>\*</sup>Excludes adalimumab taken as study drug in COAST-V. <sup>‡</sup>BASDAI Question 2. <sup>§</sup>Mean of BASDAI Questions 5 and 6.

Abbreviations: ASDAS, Ankylosing Spondylitis Disease Activity Score; axSpA, axial spondyloarthritis; BASDAI, Bath Ankylosing Spondylitis Disease Activity Index; BASFI, Bath Ankylosing Spondylitis Functional Index; BASMI, Bath Ankylosing Spondylitis Metrology Index; BMI, body mass index; csDMARD, conventional synthetic disease-modifying antirheumatic drug; ID, inactive disease; IXE, ixekizumab; LDA, low disease activity; N, number of patients; NSAID, non-steroidal anti-inflammatory drug; PatGA, Patient Global Assessment of Disease Activity; Q2W, every 2 weeks; Q4W, every 4 weeks; SD, standard deviation; TNFi, tumour necrosis factor inhibitor.
