# Supplementary material for: Recapture and retreatment rates with ixekizumab after withdrawal of therapy in patients with axial spondyloarthritis: results at week 104 from a randomised placebo-controlled withdrawal study
Source: HighWire-hosted journal article supplement (doi:10.1136/ard-2022-222731), 2022-09-13
Supplement: ard-2022-222731supp004_data_supplement.pdf [file ard-2022-222731supp004_data_supplement.pdf]

**Supplementary Table 2.** Patient characteristics associated with flare during the randomised withdrawal-retreatment period of COAST-Y.

| Variable                                                                                               | Category                             | Odds ratio (95% CI) | p-value |
|--------------------------------------------------------------------------------------------------------|--------------------------------------|---------------------|---------|
| <b>Categorical</b>                                                                                     |                                      |                     |         |
| Treatment <sup>a</sup>                                                                                 | Placebo (N=53), IXE (N=102)          | 5.51 (2.68,11.33)   | <0.001  |
| Sustained low CRP                                                                                      | Yes (N=136), No (N=19)               | 0.40 (0.15,1.05)    | 0.063   |
| BMI group at week 0 of COAST-Y                                                                         | Non-normal (N=86), normal (N=69)     | 1.81 (0.93,3.52)    | 0.081   |
| Residual inflammation by MRI at Week 24 of COAST-Y                                                     | Yes (N=55), No (N=84)                | 1.79 (0.89,3.60)    | 0.101   |
| Geographic region                                                                                      | Non-Europe (N=97), Europe (N=58)     | 1.63 (0.82,3.23)    | 0.165   |
| Length of IXE treatment at week 24 of COAST-Y                                                          | 24-60 weeks (N=69), 76 weeks (N=86)  | 1.51 (0.79,2.90)    | 0.215   |
| Tobacco use group                                                                                      | Ever (N=63), Never (N=92)            | 0.89 (0.46,1.73)    | 0.741   |
| Concomitant DMARD use at Week 0 of COAST-Y                                                             | Yes (N=63), No (N=92)                | 1.41 (0.73,2.72)    | 0.310   |
| CRP group at week 24 of COAST-Y                                                                        | >5 mg/L (N=22), ≤5 mg/L (N=133)      | 1.43 (0.57,3.55)    | 0.442   |
| Anti-drug antibody positive at any time between Week 0 of the originating study and Week 24 of COAST-Y | Yes (N=32), No (N=123)               | 1.35 (0.61,2.97)    | 0.458   |
| HLA-B27 at baseline of originating study                                                               | Positive (N=137), negative (N=18)    | 0.74 (0.27,2.00)    | 0.554   |
| Age group at Week 0 of COAST-Y                                                                         | ≥35 years (N=88), <35 years (N=67)   | 1.18 (0.61,2.28)    | 0.616   |
| Prior TNFi experience                                                                                  | Yes (N=26), No (N=129)               | 1.24 (0.53,2.91)    | 0.626   |
| Symptom duration group at Week 0 of COAST-Y                                                            | ≥10 years (N=85), <10 years (N=70)   | 0.86 (0.45,1.65)    | 0.653   |
| Tobacco use group                                                                                      | Current (N=45), Former/Never (N=110) | 1.12 (0.55,2.28)    | 0.751   |
| CRP group at baseline of originating study                                                             | >5 mg/L (N=96), ≤5 mg/L (N=59)       | 1.05 (0.54,2.06)    | 0.876   |
| Anti-drug antibody positive at Week 24 of COAST-Y                                                      | Yes (N=10), No (N=143)               | 1.10 (0.30,4.07)    | 0.888   |
| Symptom duration group at Week 0 of COAST-Y                                                            | ≥5 years (N=123), <5 years (N=32)    | 1.03 (0.46,2.30)    | 0.941   |
| Sex                                                                                                    | Male (N=116), Female (N=39)          | 0.98 (0.46,2.06)    | 0.953   |
| AxSpA classification                                                                                   | r-axSpA (N=97), nr-axSpA (N=58)      | 1.01 (0.52,1.97)    | 0.979   |
| <b>Continuous</b>                                                                                      |                                      |                     |         |
| ASDAS area under the curve <sup>b</sup>                                                                | Continuous                           | 1.06 (1.01,1.11)    | 0.021   |
| CRP at baseline of originating study                                                                   | Continuous                           | 1.02 (1.00,1.04)    | 0.037   |
| ASDAS at week 24 of COAST-Y                                                                            | Continuous                           | 2.09 (1.02,4.27)    | 0.044   |
| Total back pain at Week 24 of COAST-Y                                                                  | Continuous                           | 1.26 (1.00,1.60)    | 0.050   |
| BASDAI inflammation at Week 24 of COAST-Y                                                              | Continuous                           | 1.31 (0.95,1.79)    | 0.095   |
| PatGA at Week 24 of COAST-Y                                                                            | Continuous                           | 1.21 (0.95,1.54)    | 0.123   |
| BASDAI at Week 24 of COAST-Y                                                                           | Continuous                           | 1.25 (0.93,1.69)    | 0.144   |
| ASDAS at baseline of originating study                                                                 | Continuous                           | 1.24 (0.85,1.82)    | 0.257   |
| BASFI at Week 24 of COAST-Y                                                                            | Continuous                           | 1.16 (0.88,1.54)    | 0.284   |
| CRP at Week 24 of COAST-Y                                                                              | Continuous                           | 1.05 (0.94,1.18)    | 0.353   |
| CRP area under curve <sup>b</sup>                                                                      | Continuous                           | 1.00 (1.00,1.01)    | 0.365   |
| BASFI at baseline of originating study                                                                 | Continuous                           | 1.05 (0.90,1.23)    | 0.542   |
| Total back pain at baseline of originating study                                                       | Continuous                           | 1.04 (0.85,1.27)    | 0.699   |
| BASDAI at baseline of originating study                                                                | Continuous                           | 1.04 (0.83,1.28)    | 0.752   |
| BASDAI inflammation at baseline of originating study                                                   | Continuous                           | 0.98 (0.82,1.17)    | 0.809   |
| PatGA at baseline of originating study                                                                 | Continuous                           | 1.02 (0.84,1.23)    | 0.856   |

<sup>a</sup>Treatment group (placebo or IXE) at the start of the randomized withdrawal period at week 24 of COAST-Y, <sup>b</sup>Area under the curve for ASDAS and CRP are defined as the area under the curve across time from weeks 0 to 24 in COAST-Y. Abbreviations: ASDAS, Ankylosing Spondylitis Disease Activity Score; BMI, body mass index; CI, confidence interval; CRP, C-reactive protein; IXE, ixekizumab.
