# Supplementary material for: Recapture and retreatment rates with ixekizumab after withdrawal of therapy in patients with axial spondyloarthritis: results at week 104 from a randomised placebo-controlled withdrawal study
Source: PubMed Central journal article supplement — Ann Rheum Dis. 2022 Sep 13;82(2):212–6. doi: 10.1136/ard-2022-222731 (PMC9887347; doi:10.1136/ard-2022-222731), 2022-09-13
Supplement: ard-2022-222731supp005.pdf [file ard-2022-222731supp005.pdf]

**Supplementary Table 3.** Patient characteristics associated with flare during the randomized withdrawal-retreatment period of COAST-Y (multivariate model after stepwise selection).

| Variable                                | Category   | Odds ratio (95% CI) | p-value |
|-----------------------------------------|------------|---------------------|---------|
| ASDAS area under the curve <sup>a</sup> | Continuous | 1.08 (1.03,1.14)    | 0.004   |

<sup>a</sup>Area under the curve for ASDAS is defined as the area under the curve across time from Week 0 to Week 24 in COAST-Y. Abbreviations: ASDAS, Ankylosing Spondylitis Disease Activity Score; CI, Confidence interval, IXE, ixekizumab.
