# Supplementary material for: Recapture and retreatment rates with ixekizumab after withdrawal of therapy in patients with axial spondyloarthritis: results at week 104 from a randomised placebo-controlled withdrawal study
Source: PubMed Central journal article supplement — Ann Rheum Dis. 2022 Sep 13;82(2):212–6. doi: 10.1136/ard-2022-222731 (PMC9887347; doi:10.1136/ard-2022-222731), 2022-09-13
Supplement: ard-2022-222731supp006.pdf [file ard-2022-222731supp006.pdf]

**Supplementary Table 4.** Patient characteristics associated with flare during the randomized withdrawal-retreatment period of COAST-Y (final model with interaction effect).

| Variable                                                   | Category                                                                                                                          | Estimate (SE)      | p-value |
|------------------------------------------------------------|-----------------------------------------------------------------------------------------------------------------------------------|--------------------|---------|
| Treatment                                                  | Continued IXE versus withdrawn to placebo                                                                                         | -2.544<br>(0.4723) | <0.001  |
| ASDAS area under the curve <sup>a</sup>                    | Continuous                                                                                                                        | 0.080<br>(0.0288)  | 0.006   |
| Symptom duration group at Week 0 of COAST-Y (<5 years)     | <5 years versus ≥5 years                                                                                                          | -1.681<br>(0.7235) | 0.020   |
| Symptom duration group at Week 0 of COAST-Y *<br>Treatment | Symptom duration group at Week 0 of COAST-Y (<5 years versus ≥5 years) *<br>Treatment (continued IXE versus withdrawn to placebo) | 2.650<br>(0.9139)  | 0.004   |

<sup>a</sup>Area under the curve for ASDAS is defined as the area under the curve across time from Week 0 to Week 24 in COAST-Y. Abbreviations: ASDAS, Ankylosing Spondylitis Disease Activity Score; SE, standard error.
